# Supplementary material
Source: PubMed Central journal article supplement (PMC3900004)
Supplement: Supp_Fig1.pdf [file Supp_Fig1.pdf]

## Supplementary Data

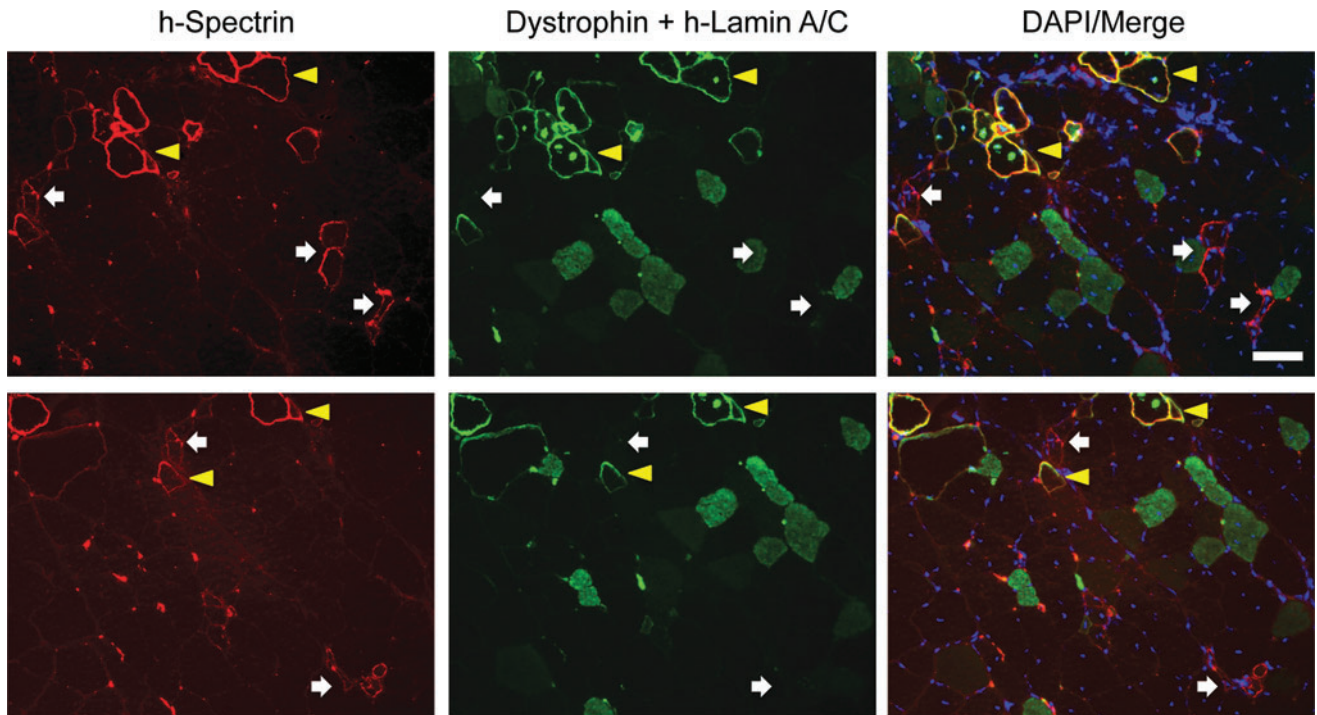

**SUPPLEMENTARY FIG. S1.** Spectrin-reactive myofibers may or may not coexpress dystrophin or lamin A/C. Recipient NOD/*Rag1*<sup>null</sup>*mdx5<sup>co</sup>* muscles 2 months after injection of  $1 \times 10^5$  MCAM<sup>+</sup> human fetal cells show the presence of myofibers positive for human spectrin, dystrophin, and human lamin A/C (yellow arrowheads). In addition, myofibers reactive to human spectrin but negative for dystrophin and lamin A/C expression were detected (white arrows), raising ambiguity about the engraftment of human cells. h-spectrin, human spectrin; h-lamin A/C, human lamin A/C. Scale bar: 50  $\mu$ m
