# Supplementary material
Source: PubMed Central journal article supplement (PMC3900004)
Supplement: Supp_Fig2.pdf [file Supp_Fig2.pdf]

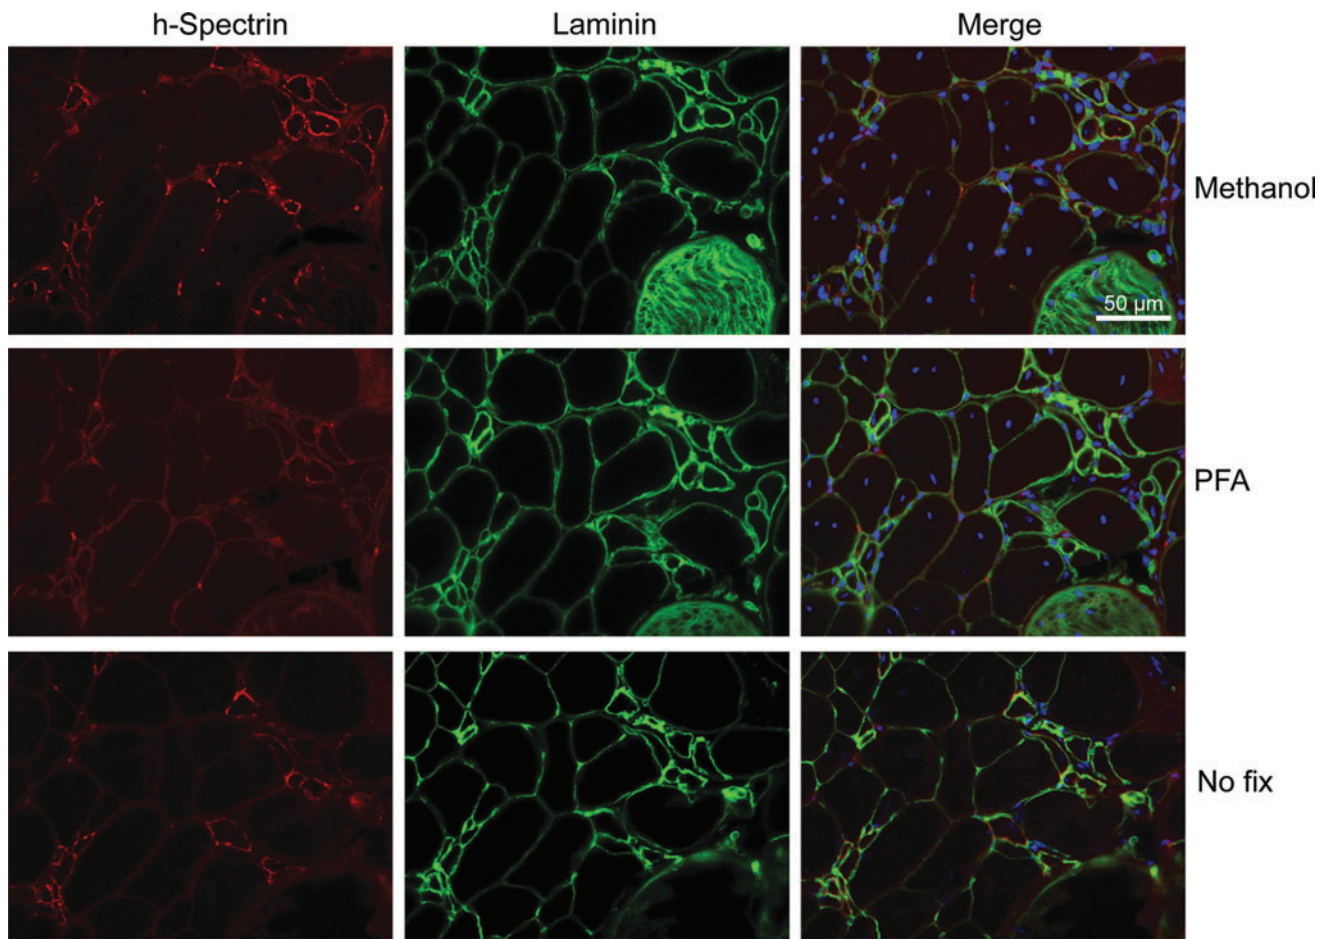

**SUPPLEMENTARY FIG. S2.** Reactivity to spectrin is detected in recipient mice regardless of the fixation method used. Consecutive muscle tissue sections of NOD/*Rag1*<sup>null</sup>*mdx5<sup>cv</sup>* mice never injected with human cells were fixed with methanol or PFA, or remained unfixed. The same area of spectrin-reactive myofibers was detected with any of the fixation methods used, with methanol-fixed and unfixed tissue showing the strongest reactivity.
