# Supplementary material
Source: PubMed Central journal article supplement (PMC3900004)
Supplement: Supp_Fig3.pdf [file Supp_Fig3.pdf]

Plot of gj|338441|gb|AAA60579.1| vs gj|110431378|ref|NP\_035812.3

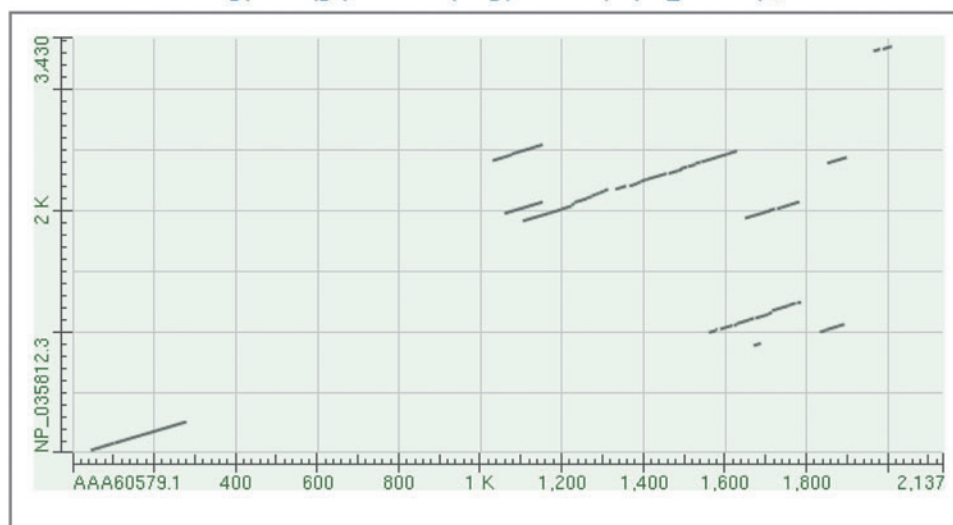

Summary of the most significant hits between human beta-spectrin and mouse utrophin:

| Hits | % identity | % pos | align length | mismatches | gap opens | q. start | q.end | s.start | s.end | E value  | bit score |
|------|------------|-------|--------------|------------|-----------|----------|-------|---------|-------|----------|-----------|
| 1    | 45.76      | 65.25 | 236          | 126        | 2         | 45       | 279   | 22      | 256   | 2.00E-62 | 226       |
| 2    | 25.76      | 50.76 | 132          | 89         | 3         | 1031     | 1153  | 2410    | 2541  | 3.00E-07 | 44.3      |
| 3    | 26.6       | 44.68 | 94           | 69         | 0         | 1060     | 1153  | 1975    | 2068  | 4.00E-06 | 40.4      |
| 4    | 21.57      | 39.05 | 612          | 360        | 23        | 1105     | 1630  | 1912    | 2489  | 6.00E-04 | 33.5      |

| Alignment statistics for match #1 |                                                             |                              |              |              |           |  |
|-----------------------------------|-------------------------------------------------------------|------------------------------|--------------|--------------|-----------|--|
| Score                             | Expect                                                      | Method                       | Identities   | Positives    | Gaps      |  |
| 226 bits(575)                     | 2e-62                                                       | Compositional matrix adjust. | 108/236(46%) | 154/236(65%) | 2/236(0%) |  |
| hSpec 45                          | IKALADEREVVQKKTFTKWNSHLARVS-CRITDLYKDLRDGRMLIKLLEVLSGEMLPKP | 103                          |              |              |           |  |
| mÜtro 26                          | IK+ +DE VQKKTFTKW+N+ ++ I+D++ DL+DGR L+ LLE L+G LPK         | 84                           |              |              |           |  |
| hSpec 104                         | IKSRSEHNDVQKKTFTKWINARFSKSGKPPISDMFSDLKDRKLLDLEGLTGTSLPK-   | 84                           |              |              |           |  |
| hSpec 104                         | TKGKMRHICLENVDKALQFLKEQRVHLENMGSHDIVDGNHRLVGLIWTIILRFQIQDIV | 163                          |              |              |           |  |
| mÜtro 85                          | +G R+H L NV++ LQ L + V L N+G DIVDGN +L LGL+W+IIL +Q++D++    | 144                          |              |              |           |  |
| hSpec 164                         | ERGSTRVHALNPNRVLQVLHQNNDLVNIGGTDIVDGNPKLTGLLWSIILHWQVKDVM   | 144                          |              |              |           |  |
| hSpec 164                         | VQTQEGRETRSAKDALLWCQKMTAGYPHVNVNFTSSWKDGLAFNALIHKHRPDLIDFD  | 223                          |              |              |           |  |
| mÜtro 145                         | + +++ LL W + T Y VNV NET+SW DGLAFNA++H+PDL +D               | 204                          |              |              |           |  |
| hSpec 224                         | KDIMSLLQQTNSEKILLSWVRQTRPYSQVNVNFTTSDGLAFNAVLRHHRKPDFLFSWD  | 204                          |              |              |           |  |
| hSpec 224                         | KLKDSNARHNLEHAFNVAERQLGIIPLLDPEDVFTENPDEKSIITYVVFYHYFSK     | 279                          |              |              |           |  |
| mÜtro 205                         | ++ + LEHAF+ A LGI LLDPEDV PD+KSII Y+ + + +                  | 260                          |              |              |           |  |
| hSpec 224                         | RVKMSPIERLEHAFSKAHTYLGIEKLLDPEDVAVHLPDKKSIIMYLTSLFEVLPQ     | 260                          |              |              |           |  |

**SUPPLEMENTARY FIG. S3.** Summary of similarity hits between human  $\beta$ -spectrin and mouse utrophin. The two-protein BLAST comparison search was performed according to the Position-Specific Iterative Basic Local Alignment Search Tool (PSI-BLAST) method from the NCBI website. *Top:* A dot matrix view. Alignment analysis of human  $\beta$ -spectrin and mouse utrophin showed several hits. *Middle:* The best four hits. *Bottom:* The two-sequence alignment of the most significant hit is also shown.
